# Supplementary material
Source: MDPI journal article supplement (https://www.mdpi.com/2673-4591/37/1/1)
Supplement: s1 [file s1]

## Abstract

Fossil fuel reserves have depleted. So, renewable and sustainable energy form an important issue. Microalgae as a third generation biomass can be an alternative carbon neutral fuel source. But its fuel quality is low. Co-pyrolysis is important technique to upgrade fuel quality of microalgae. In this study, we aimed to carry out pyrolysis of polystyrene and Spirulina sp. microalgae at low temperatures (350, 400, 450 °C). The experiments were done by using semi-batch reactor setup. Co-pyrolytic product yields were calculated. Composition of liquid products was enlightened by using GC-MS. As a result of the analysis, it was detected aromatic compounds like styrene, toluene in the co-pyrolytic liquid. Besides that it was observed co-pyrolysis was increased solid residue yield while it was decreased liquid and gas product yield.

**Keywords:** Polystyrene, plastic wastes, microalgae, biomass, pyrolysis

## Introduction

Carbon neutral fuels have huge importance on the sustainability. Microalgae as a non-edible feedstock occur an alternative to the first generation biomass sources [1]. However, it has been known that the fuel which is obtained from microalgae pyrolysis has some disadvantages like high humidity and protein content. So co-pyrolysis with several materials like tires, plastics and bamboo waste seems the good way to obtain high quality fuel [2]. In this study, it was aimed to determine the effect of blending PS to SP feed on the liquid yield and composition compared to PS pyrolysis. The experiments were conducted several temperatures (350, 400, 450 °C) which were selected as possible as low.

## Materials and Method

The plastic waste source, polystyrene (PS), was supplied as an electronic device package. Before the pyrolysis it was divided small pieces and dried in oven. The microalgae source, Spirulina (SP), was bought in powder form commercially.

Pyrolysis setup covers ceramic furnace, Nitrogen bottle, PID temperature controller, thermocouples, glass reactor and condensers. (Fig. 1) Before the experiments, setup was purged with nitrogen.

Product yields were calculated. Liquid products were analysed via GC-MS. Co-pyrolysis of SP and PS was done by adding equal amount of feedstock to the reactor.

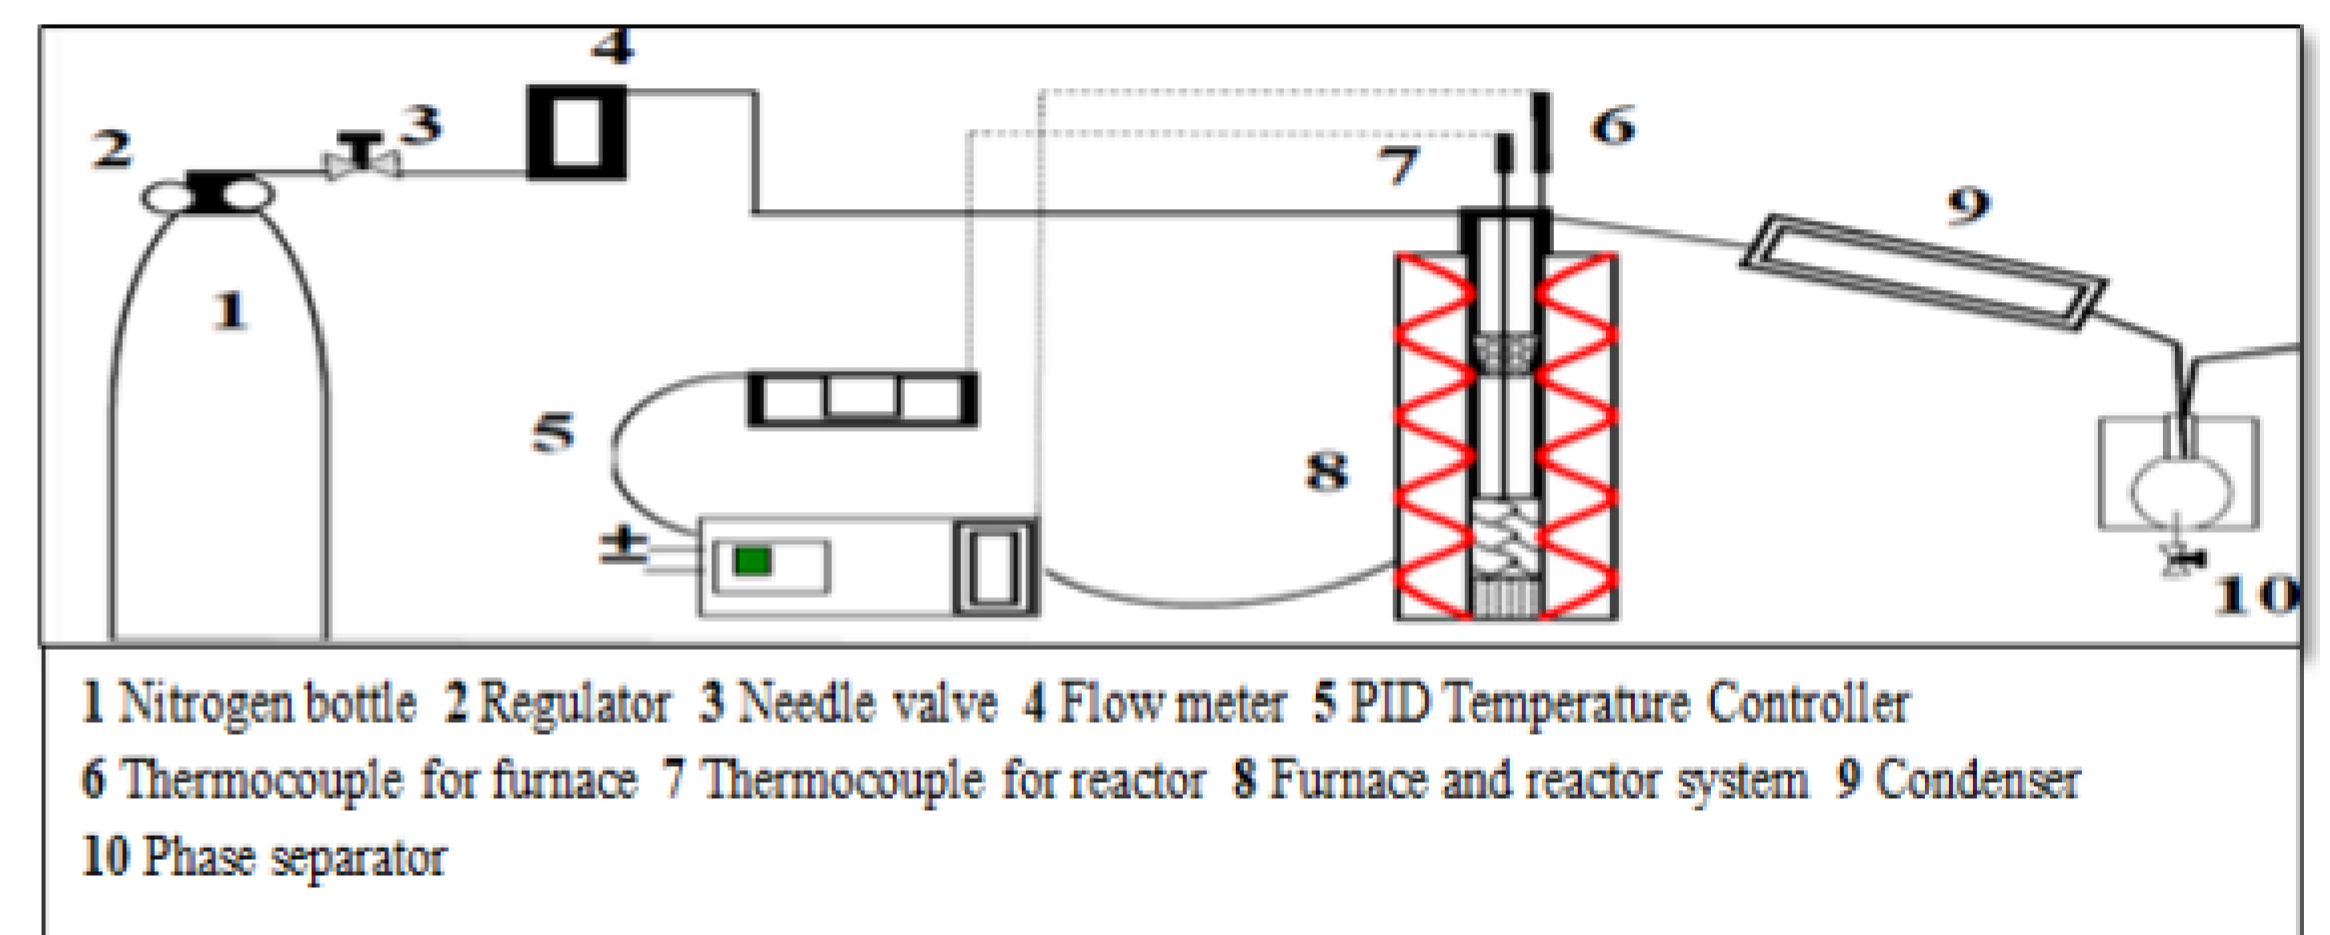

**Figure 1.** Pyrolysis set up [3]

## Results and Discussion

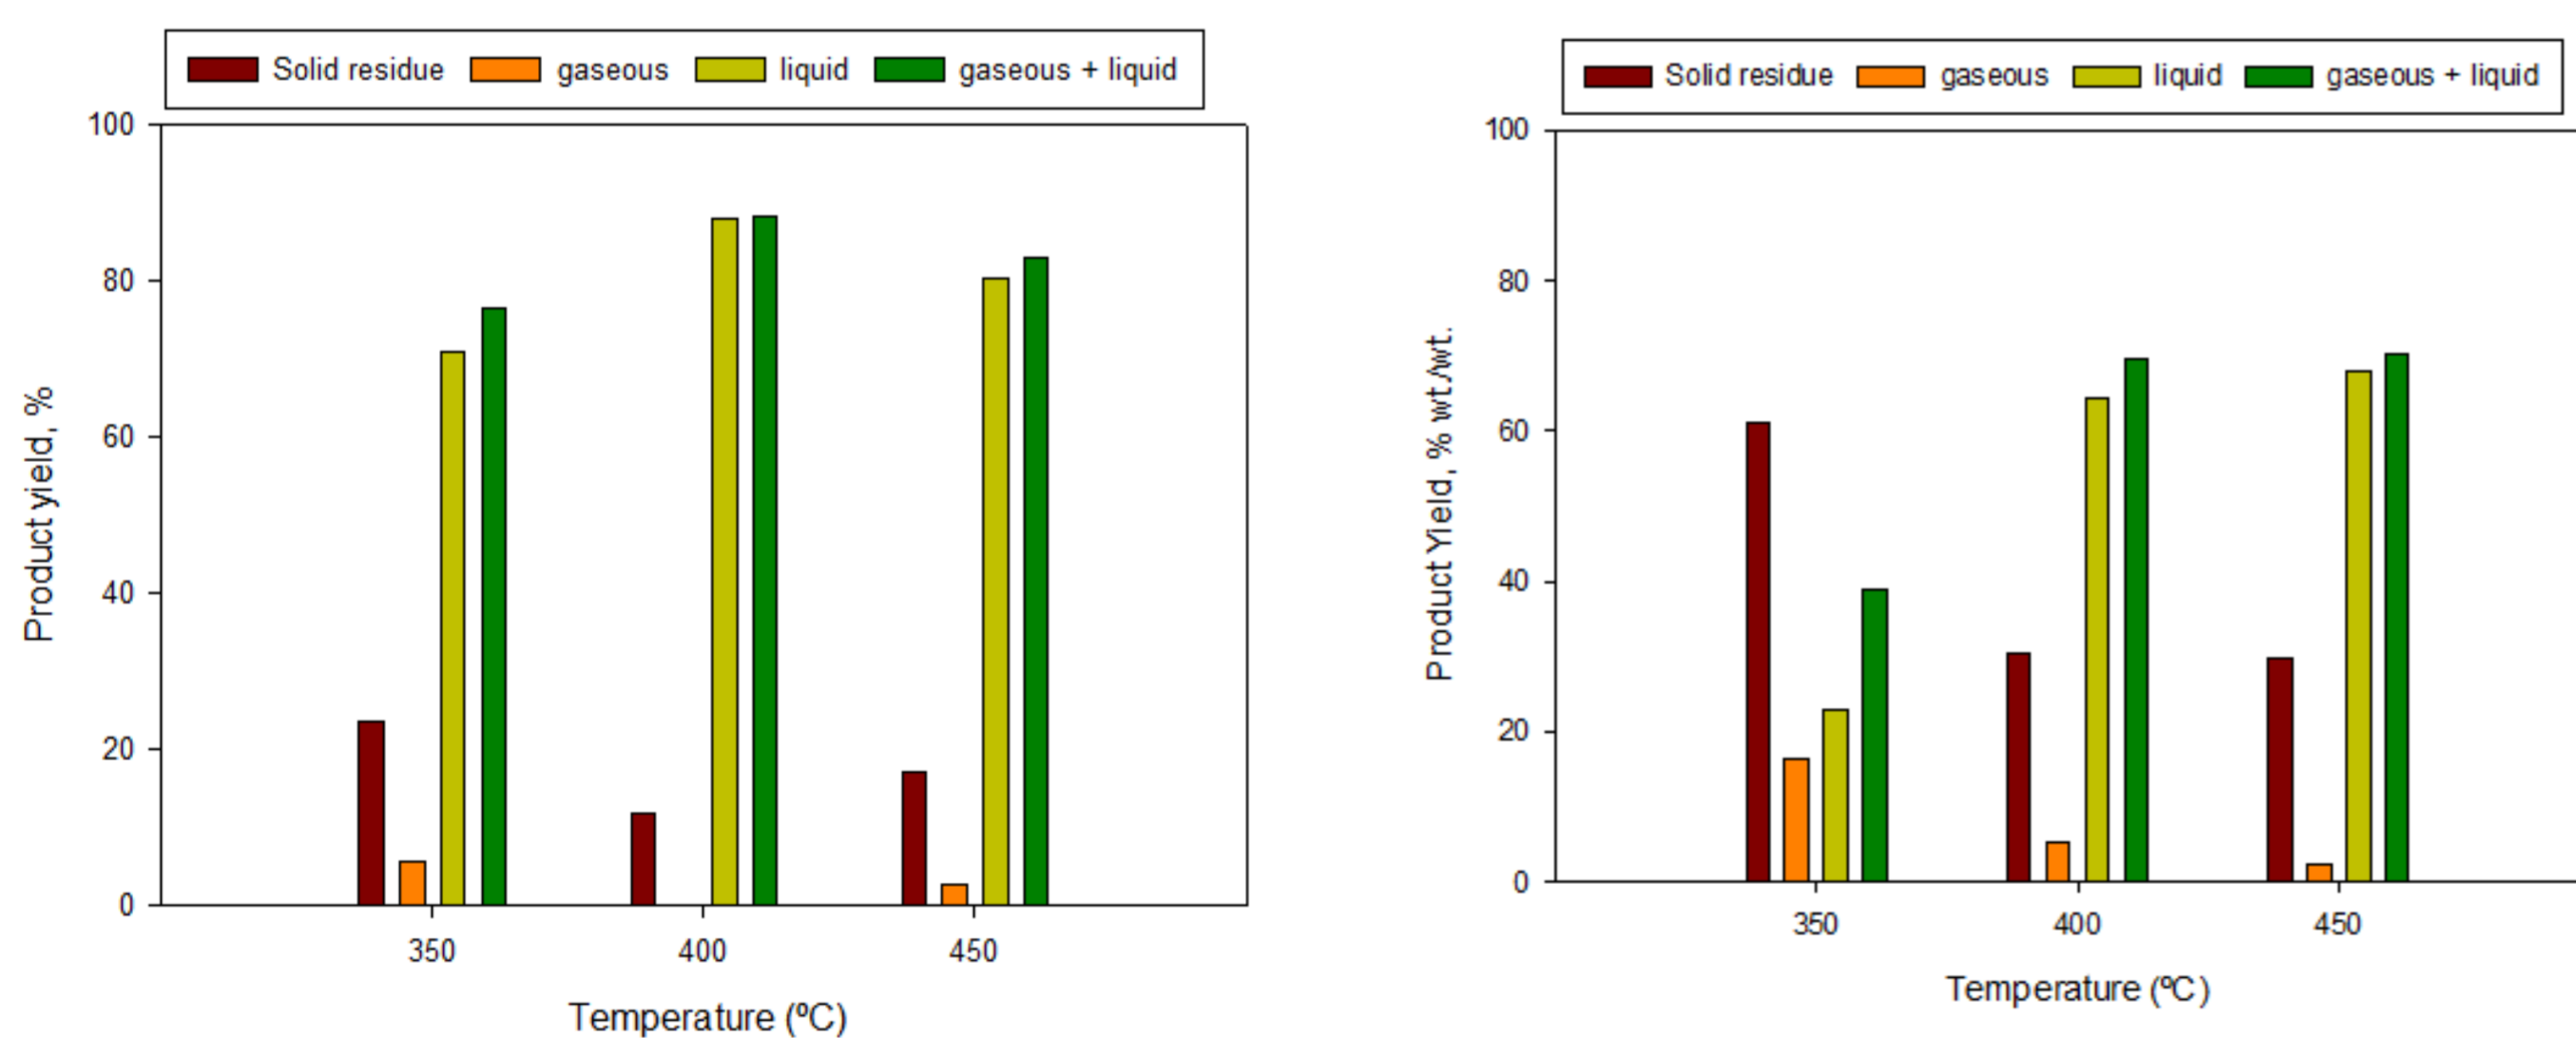

**Figure 2.** Pyrolytic product distribution by weight for PS (left) and PS:Algae (right)

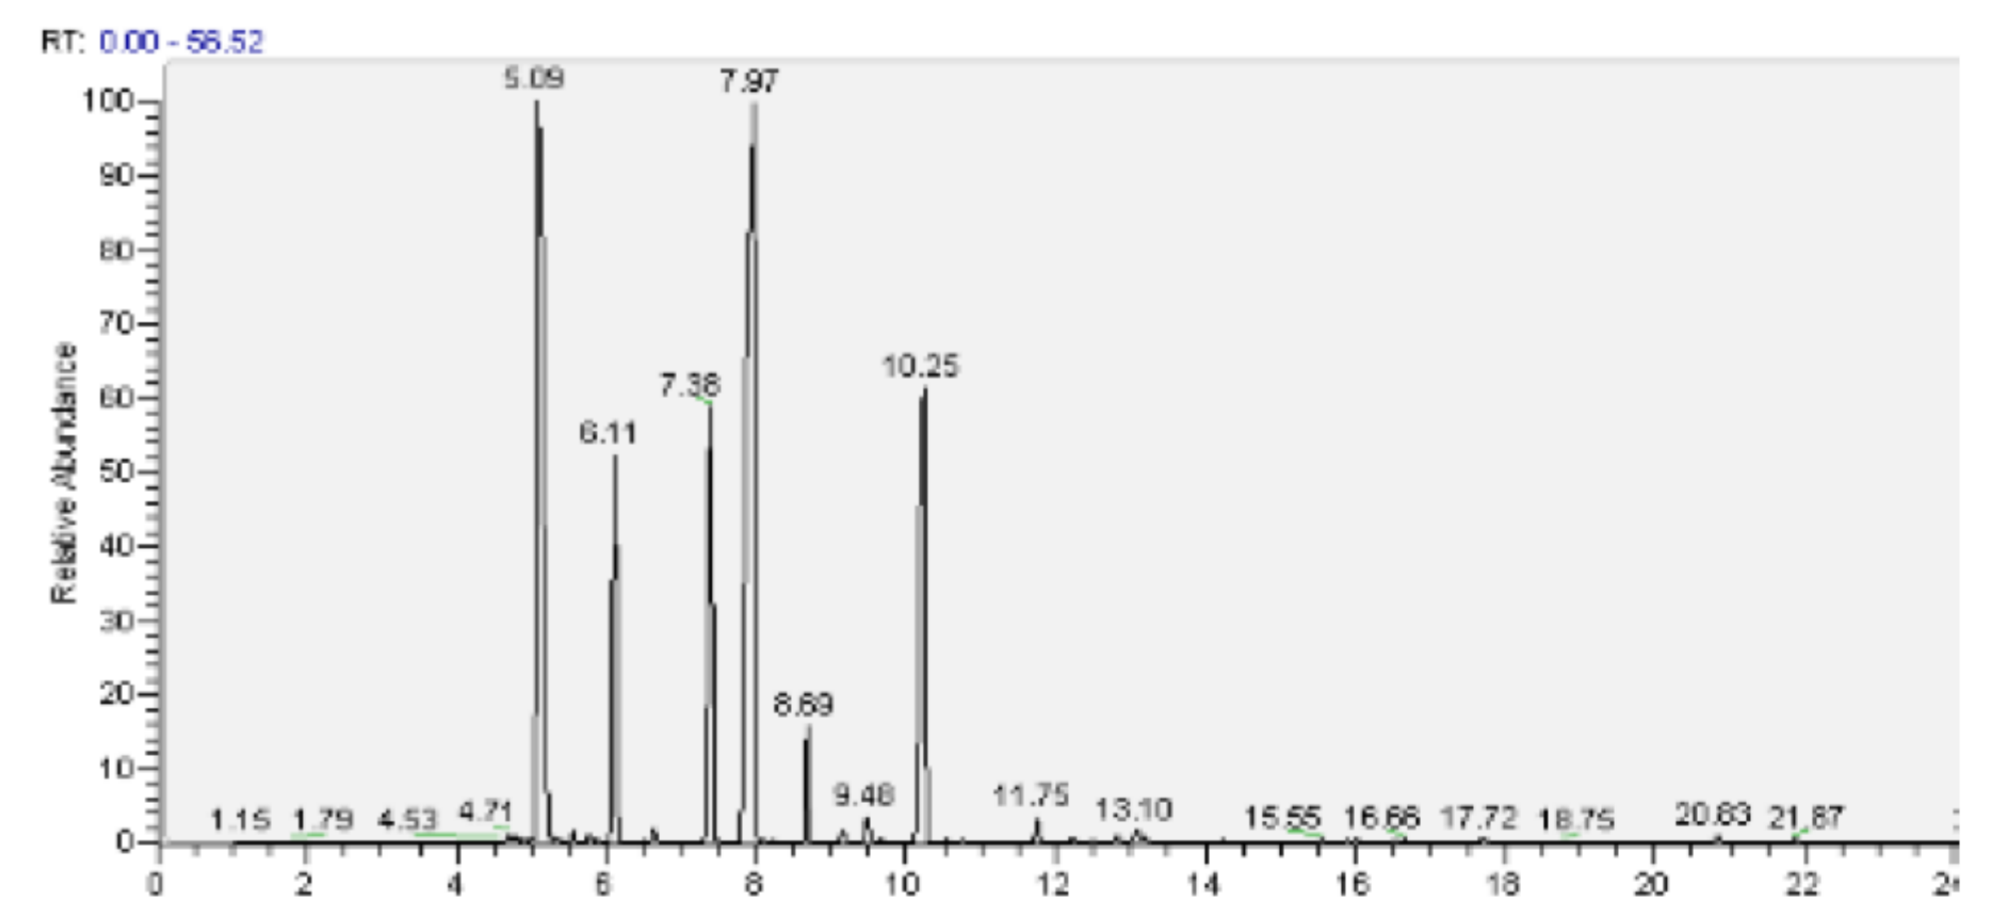

**Figure 3.** GC-MS chromatogram for the Liquid Product obtained from PS-Algae co-pyrolysis at 450 °C

**Table 1.** Detecting components in the pyrolytic liquid products by GC-MS

| PS             | Temperature (°C) |       |      | PS + Algae     | Temperature (°C) |       |       |
|----------------|------------------|-------|------|----------------|------------------|-------|-------|
|                | 350              | 400   | 450  |                | 350              | 400   | 450   |
| Compound       | Peak area, %     |       |      | Compound       | Peak area, %     |       |       |
| Benzene        | 0.5              | 0.85  | 0    | Toluene        | 5.5              | 6.62  | 5.9   |
| Toluene        | 9.25             | 3.5   | 6.6  | Ethyl benzene  | 7.25             | 9.66  | 7.85  |
| Ethyl Benzene  | 8.75             | 4.7   | 7.92 | Styrene        | 24.8             | 26.89 | 26.7  |
| Styrene        | 46.7             | 16.05 | 29   | Phenol         | 0                | 1.2   | 0.9   |
| Methyl styrene | 24.15            | 9.5   | 10.6 | Methyl styrene | 9.45             | 14    | 10.65 |
| Other          | 10.75            | 65.45 | 46   | Other          | 51.22            | 43    | 49.04 |

## References

- [1] Patil, V., Tran, K. Q., Giselrød, H. R., (2008). Towards sustainable production of biofuels from microalgae, International journal of molecular sciences, 9(7), 1188-1195.  
[2] Su, G., Ong, H. C., Gan, Y. Y., Chen, W. H., Chong, C. T., & Ok, Y. S. (2022). Co-pyrolysis of microalgae and other biomass wastes for the production of high-quality bio-oil: Progress and prospective. Bioresource technology, 344, 126096.  
[3] Özçakir, G., Karaduman, A., "Chemical recovery from polystyrene waste and low density polyethylene via conventional pyrolysis" Eskişehir Osmangazi Üniversitesi Mühendislik ve Mimarlık Fakültesi Dergisi, 28(2),155-163, 2020.

## Acknowledgement

This research was funded by ANKARA UNIVERSITY COORDINATORSHIP OF SCIENTIFIC RESEARCH PROJECTS, grant number 17L0443014.
